# Supplementary material
Source: Springer Nature journal article supplement (https://www.springermedizin.de/resource/supplementary/12889_2009_1688_MOESM1_ESM.pdf/9503732)

Per cent

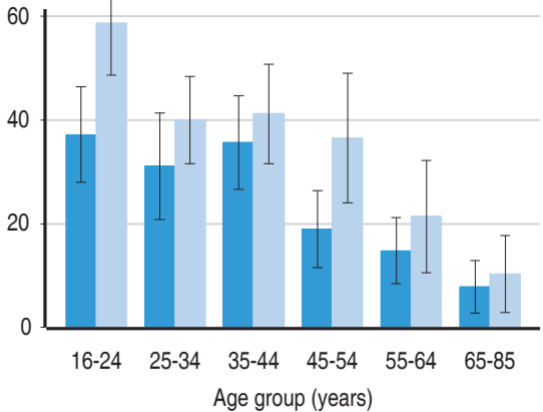

■ Males      ■ Females

Supplement: MOESM1 [file 9503732]
